1 United States influenza 2022-2023 season characteristics as inferred from wastewater solids,  
2 influenza hospitalization and syndromic data

3

4 Mary E. Schoen<sup>1</sup>, Amanda L. Bidwell<sup>2</sup>, Marlene K. Wolfe<sup>3</sup>, Alexandria B. Boehm<sup>4</sup>

5 1. Soller Environmental, LLC, 3022 King St., Berkeley, CA 94703, USA;

6 2. Department of Civil & Environmental Engineering, School of Engineering and Doerr & School of  
7 Sustainability, Stanford University, 473 Via Ortega, Stanford, CA, USA 94305

8 3. Gangarosa Department of Environmental Health, Rollins School of Public Health, Emory  
9 University, 1518 Clifton Rd, Atlanta, GA, USA, 30322

10 4. Department of Civil & Environmental Engineering, School of Engineering and Doerr & School of  
11 Sustainability, Stanford University, 473 Via Ortega, Stanford, CA, USA 94305

12

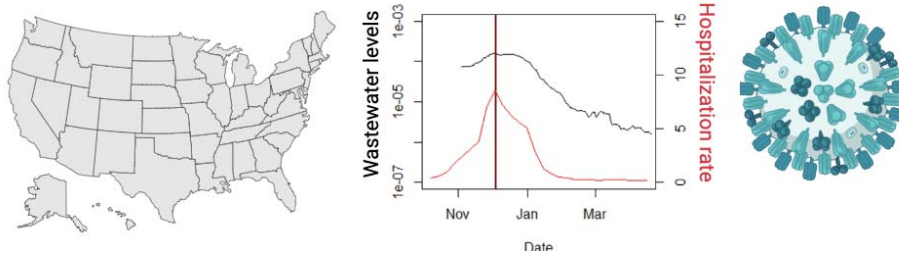

13

14

15 Abstract

16 Influenza A virus (IAV) causes significant morbidity and mortality in the United States and has  
17 pandemic potential. Identifying IAV epidemic patterns is essential to inform the timing of

18 vaccines and non-pharmaceutical interventions. In a prospective, longitudinal study design, we

19 measured IAV RNA in wastewater settled solids at 163 wastewater treatment plants across 33

20 states to characterize the 2022-2023 influenza season at the state, health and human services

21 (HHS) regional, and national scales. Influenza season onset, offset, duration, peak, and

22 intensity using IAV RNA in wastewater were compared with those determined using laboratory-

23 confirmed influenza hospitalization rates and outpatient visits for influenza-like illness (ILI). The

24 onset for HHS regions as determined by IAV RNA in wastewater roughly corresponded with

25 those determined using ILI when the annual geometric mean of IAV RNA concentration was

26 used as baseline (i.e., the threshold that triggers onset), although offsets between the two

27 differed. IAV RNA in wastewater provided early warning of onset, compared to the ILI estimate,  
28 when the baseline was set at twice the limit of IAV RNA detection in wastewater. Peak when  
29 determined by IAV RNA in wastewater generally preceded peak determined by IAV  
30 hospitalization rate by two weeks or less. Wastewater settled solids data is an IAV-specific  
31 indicator that can be used to augment clinical surveillance for seasonal influenza epidemic  
32 timing and intensity.

33

34 Keywords

35 Wastewater-based epidemiology, onset, epidemic pattern, baseline, influenza A

36

37 1 Introduction

38 Influenza causes significant morbidity and mortality in the United States (US) causing an  
39 estimated 44 million illnesses and upwards of 41,000 deaths annually, and costing \$16.3 billion  
40 in lost wages and hospitalizations.<sup>1</sup> Influenza can be caused by influenza A and B viruses;  
41 however, influenza B infections have been less common in recent years in the US.<sup>2</sup> Influenza  
42 vaccines are available annually and reduce the risk of severe illness.<sup>1</sup> However, immune history  
43 and antigenic mismatch between the vaccine and circulating strains can modulate vaccine  
44 effectiveness.<sup>3</sup> IAV also has pandemic potential, owing to recombination that occurs frequently  
45 among influenza A virus (IAV) subtypes. Several subtypes emerged over the last decade that  
46 cause severe illness and evaded seasonal vaccines.<sup>4,5</sup>

47

48 Understanding the timing and severity of the annual influenza season is essential in guiding  
49 public health recommendations and planning for hospital and clinical resources. The US Center  
50 for Disease Control and Prevention (CDC) along with researchers characterize the US influenza  
51 season by estimating the onset, offset, duration, peak and intensity (defined in Table 1) using  
52 three clinical indicators with historical data: 1) outpatient visits for influenza-like illness (ILI); 2)

53 influenza-related hospitalizations; and 3) influenza- and pneumonia-related deaths.<sup>6-8</sup> These  
54 clinical indicators have been used for decades and allow comparison across influenza seasons,  
55 but have known limitations. For example, ILI can include other respiratory illnesses such as  
56 COVID-19 and relies on care-seeking behaviors of infected individuals. Hospitalizations and  
57 deaths reflect severe illness, and occur well after initial infections occur. Both indicators also  
58 have a lag in reporting; are reported at relatively large scales, e.g. aggregated by state or US  
59 Health and Human Services (HHS) region; and, in the case of hospitalizations, have limited  
60 coverage across the US.<sup>6</sup> Recently, wastewater concentrations of IAV RNA have been shown to  
61 reflect occurrence of influenza A in contributing communities.<sup>9</sup> In this study, we investigate how  
62 IAV RNA concentrations in wastewater, measured throughout the US in a prospective,  
63 longitudinal study, can augment traditional, clinical influenza indicators to characterize the 2022-  
64 2023 influenza season.

65  
66 To our knowledge, several previous studies have compared IAV RNA in wastewater to influenza  
67 occurrence in communities contributing to wastewater. Wolfe et al.<sup>9</sup> showed IAV RNA was  
68 enriched in wastewater solids compared to liquid wastewater and that concentrations correlated  
69 well with cases identified during active influenza surveillance efforts on two university  
70 campuses. Mercier et al.<sup>10</sup> used IAV concentrations in wastewater and sludge to forecast a  
71 municipal IAV outbreak and provide real-time information on the outbreak subtype. Stadler et  
72 al.<sup>11</sup> showed the presence of IAV RNA in liquid wastewater correlated to the presence of IAV at  
73 K-12 schools. Boehm et al.<sup>12</sup> showed IAV RNA in wastewaters solids at a large plant serving 1.5  
74 million people correlated with state-aggregated IAV test positivity rates. Lastly, Boehm et al.<sup>13</sup>  
75 identified a "triple-demic" when concentrations of IAV, respiratory syncytial virus (RSV), and  
76 SARS-CoV-2 RNA in wastewater solids peaked at approximately the same time in the Greater  
77 San Francisco Bay Area of California; the wastewater data was used to identify localized onset  
78 and offset of wastewater events. These previous studies have focused on small geographical

79 areas. This study aims to expand on these to examine IAV RNA concentrations in wastewater  
80 across the entire US.

81 This work compares onset, offset, duration, peak, and intensity of the 2022-2023 influenza  
82 season using clinical data and IAV RNA concentrations in wastewater settled solids aggregated  
83 to match the spatial scales over which clinical data are typically aggregated. Influenza season  
84 characteristics are then estimated at a smaller scale using IAV concentrations to illustrate the  
85 progression of onset.

## 86 2.0 Methods

### 87 2.1 Input data

#### 88 2.1.1 Clinical data

89 Influenza hospitalization rates (hereafter hospitalization rates) are calculated as the number of  
90 residents of a defined area who are hospitalized with a positive influenza laboratory test divided  
91 by the total population within the area. State hospitalization rates are calculated and reported  
92 by the Influenza Hospitalization Surveillance Network (FluSurv-NET), a collaboration between  
93 CDC, the Emerging Infections Program Network, and state and local health departments in 13  
94 geographically distributed areas in the US that conduct population-based surveillance.<sup>14</sup>  
95 FluSurv-NET hospitalization rates are reported on a weekly basis, anchored to the Saturday  
96 marking the end of each week of the year, and organized by influenza season. Hospitalization  
97 rates in units of hospitalizations per 100,000 population were downloaded from FluSurv-NET for  
98 all available states for the 2022-2023 influenza season including CA, CO, CT, GA, MD, MI, NM,  
99 NY, OH, OR, TN, and UT along with an overall network rate (herein referred to as the overall  
100 hospitalization rate).

101

102 The US Outpatient Influenza-like Illness Surveillance Network (ILINet) collects information on  
103 outpatient visits from 2000 out-patient health-care providers in all 50 states for respiratory  
104 illness.<sup>15</sup> ILINet captures visits due to any respiratory pathogen that presents with the  
105 symptoms of fever plus cough or sore throat. The percentage of patient visits to healthcare  
106 providers for ILI for the US, HHS regions, and states is reported by influenza season on a  
107 weekly basis, anchored to the Saturday marking the end of each week of the year, through the  
108 online FluView Interactive platform.<sup>2</sup>

109

110 To identify onset and offset, CDC calculates a ILI “baseline level” during non-flu weeks for HHS  
111 regions 1-10 (Figure S1) and the US. The baselines are developed by calculating the mean ILI  
112 during non-influenza weeks for the most recent three seasons excluding the COVID-19  
113 pandemic and adding two standard deviations.<sup>15</sup> We viewed the baseline levels along with the  
114 timeseries of ILI for HHS regions in FluView Interactive.

#### 115 2.1.2 IAV RNA in wastewater solids

116 Samples were collected typically three times per week at up to 163 wastewater treatment plants  
117 (WWTPs) between 5 January 2022 and 31 May 2023 (Figure S2 and Table S1). Maximum  
118 sampling frequency was daily at 8 CA WWTPs. The date on which WWTPs started participating  
119 in the prospective monitoring effort varied between 5 January 2022 and 24 May 2023 (Table  
120 S1).

121

122 Samples of settled solids were collected from the primary clarifier, or solids were obtained from  
123 raw influent by either using an Imhoff cone<sup>16</sup>, or allowing the influent to settle for 10-15 mins,  
124 and using a serological pipette to aspirate the settled solids into a falcon tube (Table S1).

125 Samples were collected by WWTP staff and sent at 4°C to the laboratory where they were  
126 processed immediately. The time between sample collection and receipt at the lab was typically

127 between 1-3 days; during this time limited degradation of the RNA targets is expected.<sup>17,18</sup> Table  
128 S1 provides additional information on the WWTPs including the type of sample collected from  
129 the WWTP, the populations served and number of samples collected. In total, these WWTPs  
130 serve 11.6% of the US population. A total of 18,590 samples were collected and analyzed.  
131  
132 Wastewater solids were subjected to pre-analytical processing to obtain nucleic-acid extracts as  
133 reported in detail in a number of different publications<sup>12,19,20</sup> and on protocols.io and outlined  
134 briefly in the supporting information (SI). Bovine coronavirus (BCoV) vaccine was spiked into  
135 each sample to gain insight into nucleic-acid recovery. The nucleic-acids were then used as  
136 templates in droplet digital RT-PCR reactions to measure concentrations of the IAV M1 gene<sup>21</sup>,  
137 pepper mild mottle virus (PMMoV) RNA<sup>21</sup>, and BCoV RNA<sup>21</sup>. The analytical approaches  
138 including the thresholding of the fluorescent values from the instrument are described in detail in  
139 the data descriptor by Boehm et al.<sup>21</sup> and are not repeated here. Concentrations are reported in  
140 units of copies per gram dry weight (cp/g). Positive and negative extraction and RT-PCR  
141 controls were run alongside all samples, as described elsewhere<sup>21</sup> and in the SI. These data  
142 have not been previously published aside from samples collected between 7/1/22 and 5/7/23 at  
143 eight of the 163 WWTPs in this study, all eight are located in the greater San Francisco Bay  
144 Area of California.<sup>13</sup>

145

## 146 2.2 Data analysis

### 147 2.2.1 Aggregated IAV/PMMoV

148 We aggregated the wastewater data across WWTPs to calculate daily average concentrations  
149 of IAV RNA normalized by PMMoV RNA for states and HHS regions. PMMoV normalization was  
150 done to account for potential differential recoveries of viral nucleic acids during the pre-  
151 analytical steps,<sup>22</sup> and because a mass balance models suggest that IAV/PMMoV should scale  
152 as disease incidence rate.<sup>23</sup> The Avg\_IAV\_State<sub>d</sub> or Avg\_IAV\_Region<sub>d</sub> is the population

153 weighted average of IAV/PMMoV<sub>n,d</sub> on day *d* from *N* WWTPs contributing to the state or region

154 calculated as:

155

$$156 \text{ Avg\_IAV\_State}_d \text{ or Avg\_IAV\_Region}_d = \frac{\sum_{n=1}^N \text{pop}_n * \text{IAV/PMMoV}_{n,d}}{\sum_{n=1}^N \text{pop}_n} \quad \text{Eq 1}$$

157

158 where pop<sub>n</sub> is the population served by WWTP *n*. IAV/PMMoV<sub>n,d</sub> is the 5-sample trimmed

159 average of IAV/PMMoV from plant *n* on day *d*. Prior to calculating the aggregated line, non-

160 detect values are set to the limit of detection of 500 cp/g normalized by the average PMMoV

161 value for the WWTP. For days when a WWTP did not have a sample, IAV/PMMoV<sub>n,d</sub> was

162 estimated using linear interpolation between adjacent values. Weekly median Avg\_IAV\_State

163 or Avg\_IAV\_Region was calculated (Sunday through Saturday) for comparison with FluSurv-

164 NET hospitalization rate data.

165

166 We aggregated the average concentrations across states to calculate daily average

167 concentration of IAV/PMMoV for the US. The Avg\_IAV\_US<sub>d</sub> is the population weighted average

168 of Avg\_IAV\_State<sub>s,d</sub> on day *d* from *S* states calculated as:

$$169 \text{ Avg\_IAV\_US}_d = \frac{\sum_{s=1}^S \text{pop}_s * \text{Avg\_IAV\_State}_{s,d}}{\sum_{s=1}^S \text{pop}_s} \quad \text{Eq. 2}$$

170

171 where pop<sub>s</sub> is the population of state *s* and Avg\_IAV\_State<sub>s,d</sub> is calculated for state *s* using

172 equation 1. We aggregated over state, as opposed to WWTPs, to avoid oversampling of states

173 with many participating WWTPs. Only states with coverage of two or more WWTPs at time of

174 analysis were included in Eq. 2 (i.e., AL, CA, CO, FL, GA, ID, IL, IN, IA, KS, ME, MD, MI, MN,  
175 NH, NJ, NC, OH, PA, TX, UT, VT, and VA; abbreviation in Table S1). Weekly median  
176 Avg\_IAV\_US<sub>d</sub> was calculated (Sunday through Saturday) for comparison with overall  
177 hospitalization rate data.

178

### 179 2.2.2 Influenza Season Characteristics

180 Table 1 summarizes the approaches used to estimate the influenza season characteristics of  
181 onset, offset, duration, peak, and intensity for each data input. Influenza surveillance by CDC  
182 begins 10/2/2022, and ends 9/30/2023 for the 2022-2023 season; whereas, the period of  
183 analysis for this paper was 6/1/2022 - 5/31/2023 to capture the onset in states and regions that  
184 occurred earlier than the CDC starting date of 10/2/2022.

185

186 For analysis of peak and intensity, we compared characteristics using wastewater to those  
187 using hospitalization rates, given that the hospitalization rates are specific to influenza A  
188 infections. The comparison was limited to the FluSurv-NET reporting spatial scales of state and  
189 the overall network estimate (listed in Table 1). For analysis of onset, offset, and duration, we  
190 compared characteristics using wastewater to those using ILI, given that ILI is used by CDC to  
191 inform these characteristics.<sup>15</sup> The comparison was limited to the ILI reporting scale of HHS  
192 region (listed in Table 1). Onset, offset, and duration were also estimated for states using  
193 wastewater data.

194

### 195 2.2.3 Calculation of baseline using wastewater IAV/PMMoV

196 In an effort to mimic the approaches used by CDC and other researchers in defining influenza  
197 season onset using an off-season baseline value,<sup>24</sup> we calculated wastewater off-season  
198 baseline (hereafter “baseline”) values using four different approaches: (1) recording the  
199 Avg\_IAV\_Region values that correspond with the ILI onset and offset dates, (2) calculating the



200 annual Avg\_IAV\_Region mean over of the period of analysis, (3) calculating the annual  
201 Avg\_IAV\_Region geometric mean over the period of analysis, and (4) calculating twice the  
202 minimum Avg\_IAV\_Region from start of collection (which varied) to the end of the period of  
203 analysis (representing roughly twice the lowest detectable concentration). Method 1 is  
204 dependent on ILI and interprets the ILI baseline in terms of Avg\_IAV\_Region. State baseline  
205 values were estimated using Avg\_IAV\_State data and methods 2 - 4; ILI baseline values are not  
206 available at the state level. Methods 2 and 3 are based on WHO guidance for the aggregate  
207 average method<sup>25</sup>, but using only one year of data rather than multiple years (as multiple years  
208 were not available); while, method 4 does not require a full year of observation. The motivation  
209 to use twice the minimum was that during periods devoid of influenza activity, concentrations of  
210 IAV RNA in wastewater tend to be non-detect (see results).

211

#### 212 2.2.4 Additional analysis

213 Cumulative empirical curves of the proportion of states with onset during the 2022 - 2023  
214 influenza season were generated using wastewater IAV baselines calculated by methods 2, 3,  
215 and 4. Linear relationships were evaluated between log<sub>10</sub> transformed a) weekly median  
216 Avg\_IAV\_State and hospitalization rate at the state level and b) weekly median Avg\_IAV\_US  
217 and overall FluNet hospitalization rate (details provided in SI).

218

### 219 3 Results

#### 220 3.1 QA/QC

221 The positive and negative controls were positive and negative, respectfully, indicating no  
222 contamination. The median BCoV recovery across all the samples was 1.21 (interquartile range  
223 = 0.84 to 1.42) suggesting reasonable recovery; recovery values greater than 1 are likely a  
224 result of uncertainties associated with quantifying the quantity spiked into the samples. The  
225 reporting table from the Environmental Microbiology Minimal Information (EMMI) guidelines has

226 been provided previously in Boehm et al.<sup>21</sup>. Previous work indicated minimal inhibition of the IAV  
227 assay using the applied pre-analytical and analytical approaches.<sup>21</sup>

228

### 229 3.2 IAV Wastewater Data

230 Wastewater IAV concentrations collected from 163 WWTPs covering 33 states ranged between  
231 below the limit of detection and 15,438,760 cp/g over the period of analysis of 6/1/2022 -  
232 5/31/2023 (Figure S3 and Table S1). The IAV concentrations were normalized by PMMoV  
233 (Figure S4) and aggregated to calculate state and HHS regional average concentrations (i.e.,  
234 Avg\_IAV\_State and Avg\_IAV\_Region). The WWTP, state, and HHS regional wastewater  
235 concentrations followed seasonal patterns over the period of analysis with elevated  
236 concentrations in the winter season compared to summer, but also indicated sporadic increases  
237 in concentrations throughout the summer of the 2021-2022 season (e.g., Figures S3 and S4,  
238 Figures 1 and 2).

239

### 240 3.3 IAV baseline values

241 To identify the onset and offset of influenza season using wastewater, we identified the dates on  
242 which the Avg\_IAV\_State or Avg\_IAV\_Region exceeded a wastewater baseline value defined in  
243 one of four ways described in methods: concentrations corresponding to ILI onset and offset  
244 (method 1), the annual mean (method 2), the annual geometric mean (method 3), and twice the  
245 minimum (method 4) (Figure 1 and Table S1 for HHS regions, Figure 2 Table S3 for states).

246 Across states and HHS regions, the lowest wastewater baselines were those defined as twice  
247 the minimum (range of  $5.70 \times 10^{-7}$  -  $3.46 \times 10^{-6}$  across HHS regions and  $8.10 \times 10^{-7}$  -  $3.54 \times 10^{-6}$   
248 across states) while the highest baselines were those defined as the annual mean (range of  
249  $1.06 \times 10^{-5}$  -  $4.14 \times 10^{-5}$  across HHS regions and  $1.02 \times 10^{-5}$  -  $5.12 \times 10^{-5}$  across states), with the  
250 exception of HHS region 5 (R5) for which the baseline corresponding to the ILI offset was higher  
251 than the annual mean baseline. Baselines defined as the annual geometric mean and

252 corresponding to ILI onset and offset (only applicable to HHS regions) were generally between  
253 those described above.

254

255 3.4 Onset, offset, and duration

256 3.4.1 HHS Region comparison

257 The onset, offset and durations of the 2022-2023 influenza season determined using the ILI  
258 baseline and wastewater baseline values using methods 2-4 are compared in Figure 1 and  
259 Table S4 for HHS regions. Onset was earliest in R4 (Southeast) followed by R9 (West), R5  
260 (Midwest) or R8 (Central), and R1 (Northeast) for all baseline approaches. Note that we did not  
261 have sufficient data to examine onsets in the other HHS regions.

262

263 Comparing onset determined using ILI and wastewater, onset using the Avg\_IAV\_Region  
264 baseline corresponding to twice the minimum was up to 85 days earlier than onset calculated by  
265 the other approaches (range of 30 to 85 days); whereas, the ILI, Avg\_IAV\_Region annual mean,  
266 and Avg\_IAV\_Region annual geometric mean onset values differed less than 30 days across  
267 the HHS regions. Onset determined by the Avg\_IAV\_Region annual mean was the latest across  
268 approaches. Onset for R9 could not be determined using the baseline corresponding to twice  
269 the minimum because observations remained elevated throughout all of 2022.

270

271 The offset based on the Avg\_IAV\_Region annual mean baseline fell within a 14 day range  
272 (range of 1/8/2023 - 1/22/2023) for HHS regions with available wastewater data. The ILI offset  
273 occurred during the same 14 day range, with the exception of R9 which did not reach offset by  
274 the end of the analysis (5/31/2023) using ILI baseline. The offset using baselines based on  
275 Avg\_IAV\_Region geometric mean and twice the minimum generally occurred within a wider  
276 range (between 1/24/2023 and 4/28/2023). As a result, the influenza season durations were

277 greater using these two approaches rather than ILI baseline or Avg\_IAV\_Region annual mean  
278 baseline (with the exception of R9).

279

### 280 3.4.2 State estimates

281 State level onset, offset and duration were calculated using Avg\_IAV\_State annual mean,  
282 annual geometric mean, and twice the minimum (Figures 2 and Table S5). The order of onset  
283 and offset by method using state data mirrored the HHS region analysis as did the comparison  
284 of the duration. Similar to the regional analysis, onset for CA (in R9) could not be determined  
285 using the baseline corresponding to twice the minimum because observations remained  
286 elevated throughout the period of analysis.

287

288 Cumulative curves of the proportion of states achieving onset over time during the 2022-2023  
289 influenza season are compared using baselines of Avg\_IAV\_Region annual mean (5 states with  
290 annual data), annual geometric mean (5 states with annual data) or twice the minimum (9 states  
291 with data) (Figure 3). The curves using the baselines of annual geometric mean and annual  
292 mean were shifted to the right compared to twice the minimum consistent with their tendency to  
293 indicate later onset (also illustrated in Figure 2).

294

295 The curve using the Avg\_IAV\_State baseline of twice the minimum was roughly sigmoidal,  
296 indicating that onset happened over a narrow time interval for the majority of states despite the  
297 earliest onset in GA. GA preceded other states by 36, 30, and 13 days using baselines of twice  
298 the minimum, annual geometric mean, and annual mean, respectively. The limited number of  
299 states with sufficient data for the mean and geomean baselines made it difficult to assess curve  
300 shape. The trajectory of onset moved outward from the origin in the Southeast using all  
301 selected baselines. However, the order of onset varied by baseline method; for example, onset

302 in FL occurred before TX using the annual mean and twice the minimum baselines but after  
303 using the annual geometric mean baseline.

304

305 3.5 Peak and Intensity

306 3.5.1 State comparison

307 The 2022-2023 influenza season state peaks (i.e., date of highest measure) and intensities (i.e.,  
308 value at time of peak) are compared using wastewater (Avg\_IAV\_State) and laboratory-  
309 confirmed influenza hospitalizations collected by CDC (hospitalization rate) in Figure 4 and  
310 Table S6. The Avg\_IAV\_State peaks generally preceded the hospitalization rate peaks (range  
311 of 2 - 12 days), with the exception of MN. When the intensity as measured by hospitalization  
312 rate increased across states, the intensity measured by Avg\_IAV\_State concentration also  
313 increased across states (Table S6). The Avg\_IAV\_State peak values were roughly two orders  
314 of magnitude greater than the Avg\_IAV\_State baseline values calculated using twice the  
315 minimum observation and between roughly 1 and 2 orders of magnitudes greater than the  
316 Avg\_IAV\_State annual mean or annual geometric mean baselines.

317

318 3.5.2 US comparison

319 When Avg\_IAV\_State were aggregated to create a population weighted US value, the peaks  
320 estimated using the Avg\_IAV\_US and overall hospitalization rate fall one day apart (Figure 5b,  
321 12/03/2022 and 12/04/2022) despite having different representations of states (Figures S5 and  
322 S6). The wastewater dataset did not include state data for states with the highest intensities as  
323 measured by FluServe-Net (e.g., CT, NM, NY, OR, and TN). FluServe-Net did not include 17  
324 states with wastewater data, particularly those with early season onset (e.g., FL and TX).

325

326 3.5.3 Linear relationship

327 We found a significant relationship between  $\log_{10}$  Avg\_IAV\_State (expressed as the median of  
328 daily values each week) and  $\log_{10}$  FluSurv-NET hospitalization rate (reported weekly) for each  
329 state ( $p < 0.001$ ,  $R^2$  range of 0.74 to 0.90 across states), with a 0.61 to 0.80-unit increase in  
330  $\log_{10}$  hospitalization rate for every  $\log_{10}$  increase in Avg\_IAV\_State (Figure S7 and Table S7).  
331 Considering the US aggregated inputs, we also found a significant relationship between  $\log_{10}$   
332 Avg\_IAV\_US (expressed as the median of daily values each week) and  $\log_{10}$  overall  
333 hospitalization rate (reported weekly) ( $p < 0.001$ ,  $R^2$  of 0.89), with a 0.81-unit increase in  $\log_{10}$   
334 overall hospitalization rate for every  $\log_{10}$  increase in Avg\_IAV\_US (Figure 5a and Table S7).  
335

#### 336 4.0 Discussion

337

338 We used information on IAV and PMMoV RNA targets in municipal wastewater solids to  
339 estimate the 2022-2023 influenza season onset, offset, duration, peak and intensity. The CDC  
340 and other agencies use clinical data to estimate these characteristics.<sup>6-8</sup> To compare the  
341 wastewater estimates to the clinical estimates, we aggregated the data from 163 WWTPs in 33  
342 states to represent scales typically used for clinical data (e.g. state, HHS region, or national).  
343 Then, we estimated baseline concentrations of the aggregated wastewater data using  
344 approaches similar to those originally proposed for clinical data to identify onset, offset and  
345 duration, but with one year of data (or less) rather than multiple years.<sup>25</sup>

346

347 The wastewater baseline values were determined individually for HHS regions and states, as  
348 the ILI baseline values used by CDC are unique to each HHS region. The range of wastewater  
349 baseline values across the 5 regions covered approximately 1  $\log_{10}$  when set to correspond with  
350 ILI onset (minimum of  $2.31 \times 10^{-6}$  and maximum of  $2.73 \times 10^{-5}$ ). In comparison, the ranges of  
351 wastewater baseline values for HHS regions and states determined independently of ILI  
352 (baseline methods 2 - 4) covered less than 0.8  $\log_{10}$ . The wastewater baseline values set to

353 twice the minimum ranged between  $5.70 \times 10^{-7}$  and  $3.46 \times 10^{-6}$  across HHS regions and  $8.1 \times 10^{-7}$   
354 and  $3.54 \times 10^{-6}$  across states. For reference, the difference between peak and baseline using  
355 twice the minimum for each state was  $2 \log_{10}$  or greater. Future work can explore if baseline  
356 values are applicable across states and/or spatial scales.

357

358 Regional results indicated that onset determined using wastewater and a baseline of the annual  
359 geometric mean was similar to the onset estimated using the ILI baseline; whereas, onset  
360 determined using wastewater and a baseline of the annual mean was later than ILI-estimated  
361 onsets. Using twice the minimum observation as wastewater baseline provided an early  
362 warning (between 30 and 75 days) compared to ILI-estimated onset. We applied the same  
363 approaches to estimate wastewater baseline values for states, for which ILI baseline data are  
364 not available. The pattern of onset across baseline methods mirrored the regional analysis; in  
365 addition, the baseline method influenced the estimated progression across states, in terms of  
366 the order of onset. Thus, for the 2022-2023 influenza season, the selection of baseline using  
367 wastewater data influenced the characterization (or interpretation) of onset in time and across  
368 space.

369

370 Characterizing the differences between baseline methods allows for public health officials to  
371 select a baseline that best matches their goals for identification of and communication about  
372 influenza season. For a wastewater baseline that aligns with expected increases in ILI, the  
373 geometric mean is best, as the onset of regions using the geometric mean of wastewater data  
374 aligned with the ILI-estimated onset. Alternatively, early warning of season onset may be  
375 desirable for public health decision making; in which case, a baseline based on the minimum  
376 observation may be useful. However, selecting the threshold using the minimum observation is  
377 challenging given the variation within each season (as illustrated by HHS R9 in Figure 1 for

378 which summertime influenza activity interfered with identifying typical influenza season onset)  
379 and unknown variation between seasons (data not available to characterize).

380

381 Using information on the minimal observation is similar to the approach applied by Boehm et  
382 al.<sup>13</sup> for identifying influenza wastewater events at individual wastewater treatment plants. In the  
383 present study, using the value of twice the minimal observation to identify IAV onset seemed to  
384 capture the entire periods of increasing and decreasing concentrations in wastewater during the  
385 seasonal IAV epidemic. However, in California, spatially aggregated wastewater levels  
386 remained above this baseline for the entire summer prior to the winter influenza season.  
387 California experienced higher than normal summertime influenza activity in 2022 after not  
388 having any influenza during the height of the COVID-19 pandemic<sup>14</sup> which may have  
389 contributed to the high levels in wastewater in summer 2022. Choosing a slightly higher value  
390 (three times the minimum) as a baseline for California would have led to offset in September,  
391 followed closely by onset.

392

393 The definition of onset is also important from a practical perspective. We adopted the  
394 description of onset from CDC of the day when the measure was above the baseline value and  
395 remained there for at least two additional weeks. This definition precludes real-time  
396 determination of onset as it requires a two week period of data, which would retroactively  
397 identify an onset date at the beginning of the period when used in real time. Alternatively, a  
398 look-back window could be implemented, as applied by Boehm et al.<sup>13</sup> for IAV, which provides a  
399 real-time estimation of an onset date assigned to the end of a two week period of data. Further  
400 work could investigate that definition.

401

402 We also compared the peak and intensity of the 2022-2023 influenza season using influenza  
403 hospitalization rates to that using wastewater data for states and the US. We found that the



404 peaks estimated by wastewater data generally preceded the peaks determined by  
405 hospitalization rates for states by 6 to 14 days. The earlier peak is not surprising given that the  
406 wastewater data captures viral shedding from both asymptomatic and symptomatic infections,  
407 as well as from mild and severe infections whereas the hospitalization rate captures the most  
408 severe cases. The general agreement of peak combined with the strong relationship between  
409 Avg\_IAV\_State and hospitalization rate suggests one could use IAV RNA in wastewater solids  
410 as early warning for identifying peak hospitalization, especially for states with no clinical  
411 surveillance (e.g. data available for FL and TX for wastewater but not available in FluSurv-NET).  
412 The wastewater data could also be used at more localized scales to identify peak events, as  
413 has been illustrated previously at the building<sup>11</sup>, subsewershed<sup>9</sup>, and sewershed<sup>13</sup> levels.

414

415 A strength of the wastewater data used in this analysis is wide coverage of WWTPs across the  
416 US. This allows analysis at a localized scale, as exemplified here by the state onset analysis  
417 and by onset analysis at the sewershed level elsewhere<sup>13</sup>. This analysis is enabled by the  
418 ability to aggregate information from individual WWTPs, which is possible due to the consistent  
419 methods applied to obtain IAV and PMMoV RNA concentrations across locations. Another  
420 strength is that the wastewater data captures IAV-specific mild illness and asymptomatic illness  
421 and is agnostic as to whether individuals seek medical care; whereas, the ILI data captures data  
422 from individuals with various respiratory illnesses seeking medical care, which resulted in the  
423 exclusion of the ILI data collected over the pandemic in the calculation of the baseline.<sup>15</sup> This is  
424 particularly important as COVID-19 surveillance is expected to transition to a model that is more  
425 similar to influenza surveillance, and there is a need to distinguish IAV and COVID-19 outbreaks  
426 that share similar ailments and symptoms.

427

428 Limitations of using wastewater data to characterize influenza season include that wastewater  
429 data cannot be disaggregated by age of population, vaccine status of population, or severity of

430 disease. WWTPS participation is voluntary; therefore, coverage may vary over time and sample  
431 sites are not based on a strategic sampling plan to provide optimal coverage across the US,  
432 regions, or states. Additionally, the wastewater data lacks the historical record that clinical data  
433 provide.

434

435 Wastewater settled solids data represent an additional surveillance indicator of influenza that  
436 can be used to characterize the influenza season along with clinical data across scales currently  
437 unavailable using clinical data (e.g., US down to sewershed). Whereas the rates of influenza-  
438 associated hospitalizations are a product of the transmissibility and the clinical severity of  
439 influenza,<sup>7</sup> wastewater data may be considered as a proxy to transmissibility, similar to ILI, but  
440 IAV specific. As additional data are collected over multiple influenza seasons, the approaches  
441 introduced in this work can be refined to better capture the variation in IAV and PMMoV targets  
442 in municipal wastewater solids across seasons and further analysis can be conducted such as  
443 the moving epidemic method or aggregate average method<sup>25</sup> to evaluate IAV onset and  
444 severity.<sup>7</sup>

445

#### 446 Data Availability

447 Wastewater data are publicly available at the Stanford Digital Repository:

448 <https://doi.org/10.25740/mf441vr6745>.

449

#### 450 Author Contributions

451 The manuscript was written through contributions of all authors. All authors have given approval  
452 to the final version of the manuscript. MS and ALB computation; MS and ABB writing; MS, ALB,  
453 MW, and ABB contributed to the conception and editing of this article.

454

#### 455 ACKNOWLEDGMENT

456 We acknowledge the numerous people who contributed to wastewater sample collection.

457

#### 458 References

- 459 (1) Molinari, N.-A. M.; Ortega-Sanchez, I. R.; Messonnier, M. L.; Thompson, W. W.; Wortley,  
460 P. M.; Weintraub, E.; Bridges, C. B. The Annual Impact of Seasonal Influenza in the US:  
461 Measuring Disease Burden and Costs. *Vaccine* **2007**, *25* (27), 5086–5096.  
462 <https://doi.org/10.1016/j.vaccine.2007.03.046>.
- 463 (2) Centers for Disease Control and Prevention. *FluView Interactive | CDC*.  
464 <https://www.cdc.gov/flu/weekly/fluviewinteractive.htm> (accessed 2023-08-23).
- 465 (3) Lewnard, J. A.; Cobey, S. Immune History and Influenza Vaccine Effectiveness. *Vaccines*  
466 **2018**, *6* (2), 28. <https://doi.org/10.3390/vaccines6020028>.
- 467 (4) Yamaji, R.; Saad, M. D.; Davis, C. T.; Swayne, D. E.; Wang, D.; Wong, F. Y. K.; McCauley,  
468 J. W.; Peiris, J. S. M.; Webby, R. J.; Fouchier, R. A. M.; Kawaoka, Y.; Zhang, W. Pandemic  
469 Potential of Highly Pathogenic Avian Influenza Clade 2.3.4.4 A(H5) Viruses. *Reviews in*  
470 *Medical Virology* **2020**, *30* (3), e2099. <https://doi.org/10.1002/rmv.2099>.
- 471 (5) Yen, H.-L.; Webster, R. G. Pandemic Influenza as a Current Threat. In *Vaccines for*  
472 *Pandemic Influenza*; Compans, R. W., Orenstein, W. A., Eds.; Current Topics in  
473 Microbiology and Immunology; Springer: Berlin, Heidelberg, 2009; pp 3–24.  
474 [https://doi.org/10.1007/978-3-540-92165-3\\_1](https://doi.org/10.1007/978-3-540-92165-3_1).
- 475 (6) *U.S. Influenza Surveillance: Purpose and Methods | CDC*.  
476 <https://www.cdc.gov/flu/weekly/overview.htm> (accessed 2023-08-23).
- 477 (7) Biggerstaff, M.; Kniss, K.; Jernigan, D. B.; Brammer, L.; Bresee, J.; Garg, S.; Burns, E.;  
478 Reed, C. Systematic Assessment of Multiple Routine and Near Real-Time Indicators to  
479 Classify the Severity of Influenza Seasons and Pandemics in the United States, 2003–  
480 2004 Through 2015–2016. *American Journal of Epidemiology* **2018**, *187* (5), 1040–1050.  
481 <https://doi.org/10.1093/aje/kwx334>.
- 482 (8) Biggerstaff, M.; Alper, D.; Dredze, M.; Fox, S.; Fung, I. C.-H.; Hickmann, K. S.; Lewis, B.;  
483 Rosenfeld, R.; Shaman, J.; Tsou, M.-H.; Velardi, P.; Vespignani, A.; Finelli, L.; for the  
484 Influenza Forecasting Contest Working Group. Results from the Centers for Disease  
485 Control and Prevention’s Predict the 2013–2014 Influenza Season Challenge. *BMC*  
486 *Infectious Diseases* **2016**, *16* (1), 357. <https://doi.org/10.1186/s12879-016-1669-x>.
- 487 (9) Wolfe, M. K.; Duong, D.; Bakker, K. M.; Ammerman, M.; Mortenson, L.; Hughes, B.; Arts,  
488 P.; Lauring, A. S.; Fitzsimmons, W. J.; Bendall, E.; Hwang, C. E.; Martin, E. T.; White, B.  
489 J.; Boehm, A. B.; Wigginton, K. R. Wastewater-Based Detection of Two Influenza  
490 Outbreaks. *Environ. Sci. Technol. Lett.* **2022**, *9* (8), 687–692.  
491 <https://doi.org/10.1021/acs.estlett.2c00350>.
- 492 (10) Mercier, E.; D’Aoust, P. M.; Thakali, O.; Hegazy, N.; Jia, J.-J.; Zhang, Z.; Eid, W.; Plaza-

- 493 Diaz, J.; Kabir, M. P.; Fang, W. Municipal and Neighbourhood Level Wastewater  
494 Surveillance and Subtyping of an Influenza Virus Outbreak. *Scientific Reports* **2022**, *12* (1),  
495 15777.
- 496 (11) Wolken, M.; Sun, T.; McCall, C.; Schneider, R.; Caton, K.; Hundley, C.; Hopkins, L.; Ensor,  
497 K.; Domakonda, K.; Kalvapalle, P. Wastewater Surveillance of SARS-CoV-2 and Influenza  
498 in PreK-12 Schools Shows School, Community, and Citywide Infections. *Water Research*  
499 **2023**, *231*, 119648.
- 500 (12) Boehm, A. B.; Hughes, B.; Duong, D.; Chan-Herur, V.; Buchman, A.; Wolfe, M. K.; White,  
501 B. J. Wastewater Concentrations of Human Influenza, Metapneumovirus, Parainfluenza,  
502 Respiratory Syncytial Virus, Rhinovirus, and Seasonal Coronavirus Nucleic-Acids during  
503 the COVID-19 Pandemic: A Surveillance Study. *The Lancet Microbe* **2023**, *4* (5), e340–  
504 e348. [https://doi.org/10.1016/S2666-5247\(22\)00386-X](https://doi.org/10.1016/S2666-5247(22)00386-X).
- 505 (13) Boehm, A.; Wolfe, M. K.; White, B.; Hughes, B.; Duong, D.; Bidwell, A. Community  
506 Occurrence of Metapneumovirus, Influenza A, and Respiratory Syncytial Virus (RSV)  
507 Inferred from Wastewater Solids during the Winter 2022-2023 Triple-demic. *medRxiv* **2023**,  
508 2023–06.
- 509 (14) Centers for Disease Control and Prevention, National Center for Immunization and  
510 Respiratory Diseases (NCIRD). *Influenza Hospitalization Surveillance Network (FluSurv-*  
511 *NET)*. <https://gis.cdc.gov/GRASP/Fluview/FluHospRates.html> (accessed 2023-05-23).
- 512 (15) Centers for Disease Control and Prevention. *US Outpatient Influenza-like Illness*  
513 *Surveillance Network (ILINet)*. <https://www.cdc.gov/flu/weekly/overview.htm>.
- 514 (16) AWWA. *Standard Methods for the Examination of Water and Wastewater*, 21st ed.; Eaton,  
515 A. D., Clesceri, L. S., Rice, E. W., Greenberg, A. E., Series Eds.; American Public Health  
516 Association, American Water Works Association, Water Environment Federation:  
517 Baltimore, 2005.
- 518 (17) Guo, Y.; Li, J.; O'Brien, J.; Sivakumar, M.; Jiang, G. Back-Estimation of Norovirus  
519 Infections through Wastewater-Based Epidemiology: A Systematic Review and Parameter  
520 Sensitivity. *Water Research* **2022**, *219*, 118610.  
521 <https://doi.org/10.1016/j.watres.2022.118610>.
- 522 (18) Burnet, J.-B.; Cauchie, H.-M.; Walczak, C.; Goeders, N.; Ogorzaly, L. Persistence of  
523 Endogenous RNA Biomarkers of SARS-CoV-2 and PMMoV in Raw Wastewater: Impact of  
524 Temperature and Implications for Wastewater-Based Epidemiology. *Science of The Total*  
525 *Environment* **2023**, *857*, 159401. <https://doi.org/10.1016/j.scitotenv.2022.159401>.
- 526 (19) Wolfe, M. K.; Topol, A.; Knudson, A.; Simpson, A.; White, B.; Duc, V.; Yu, A.; Li, L.; Balliet,  
527 M.; Stoddard, P.; Han, G.; Wigginton, K. R.; Boehm, A. High-Frequency, High-Throughput  
528 Quantification of SARS-CoV-2 RNA in Wastewater Settled Solids at Eight Publicly Owned  
529 Treatment Works in Northern California Shows Strong Association with COVID-19  
530 Incidence. *mSystems* **2021**, *6* (5), e00829-21. <https://doi.org/10.1128/mSystems.00829-21>.
- 531 (20) Topol, A.; Wolfe, M.; Wigginton, K.; White, B.; Boehm, A. High Throughput RNA Extraction  
532 and PCR Inhibitor Removal of Settled Solids for Wastewater Surveillance of SARS-CoV-2  
533 RNA. **2021**.
- 534 (21) Boehm, A. B.; Wolfe, M. K.; Wigginton, K. R.; Bidwell, A.; White, B. J.; Hughes, B.; Duong,  
535 D.; Chan-Herur, V.; Bischel, H. N.; Naughton, C. C. Human Viral Nucleic Acids  
536 Concentrations in Wastewater Solids from Central and Coastal California USA. *Scientific*  
537 *Data* **2023**, *10* (1), 396.
- 538 (22) Simpson, A.; Topol, A.; White, B. J.; Wolfe, M. K.; Wigginton, K. R.; Boehm, A. B. Effect of  
539 Storage Conditions on SARS-CoV-2 RNA Quantification in Wastewater Solids. *PeerJ*  
540 **2021**, *9*, e11933. <https://doi.org/10.7717/peerj.11933>.
- 541 (23) Wolfe, M. K.; Archana, A.; Catoe, D.; Coffman, M. M.; Dorevich, S.; Graham, K. E.; Kim,  
542 S.; Grijalva, L. M.; Roldan-Hernandez, L.; Silverman, A. I.; Sinnott-Armstrong, N.; Vugia, D.  
543 J.; Yu, A. T.; Zambrana, W.; Wigginton, K. R.; Boehm, A. B. Scaling of SARS-CoV-2 RNA

- 544 in Settled Solids from Multiple Wastewater Treatment Plants to Compare Incidence Rates  
545 of Laboratory-Confirmed COVID-19 in Their Sewersheds. *Environmental Science &*  
546 *Technology Letters* **2021**, 8 (5), 398–404. <https://doi.org/10.1021/acs.estlett.1c00184>.  
547 (24) Igboh, L. S.; Roguski, K.; Marcenac, P.; Emukule, G. O.; Charles, M. D.; Tempia, S.;  
548 Herring, B.; Vandemaele, K.; Moen, A.; Olsen, S. J.; Wentworth, D. E.; Kondor, R.; Mott, J.  
549 A.; Hirve, S.; Bresee, J. S.; Mangtani, P.; Nguipdop-Djomo, P.; Azziz-Baumgartner, E.  
550 Timing of Seasonal Influenza Epidemics for 25 Countries in Africa during 2010–19: A  
551 Retrospective Analysis. *The Lancet Global Health* **2023**, 11 (5), e729–e739.  
552 [https://doi.org/10.1016/S2214-109X\(23\)00109-2](https://doi.org/10.1016/S2214-109X(23)00109-2).  
553 (25) World Health Organization. *Global Epidemiological Surveillance Standards for Influenza*;  
554 World Health Organization: Geneva, 2013.  
555

556

557

558  
559 Tables and Figures

560  
561 Table 1. Summary of influenza season characteristics, inputs, and approach details. Inputs were  
562 limited to those with sufficient available data for wastewater measurements or clinical measures  
563 as explained in the methods. NA: not applicable.  
564

| Characteristics | Description                                                                                              | Input                                                      | Inclusion Criteria                                                                                 | Approach                                                                                                                                                                                                                                                                                             |
|-----------------|----------------------------------------------------------------------------------------------------------|------------------------------------------------------------|----------------------------------------------------------------------------------------------------|------------------------------------------------------------------------------------------------------------------------------------------------------------------------------------------------------------------------------------------------------------------------------------------------------|
| Onset/Offset    | Day when measure was above/below the baseline value and remained there for at least two additional weeks | Avg_IAV_Region (R1, R4, R5, R8, and R9)                    | Regions with collection between 6/1/2022 - 5/31/2023 with coverage of two or more states.          | Wastewater baseline values were calculated as described in Section 2.3. Methods 2 and 3 require 11 months of collection. ILI baseline values were obtained from FluView. Baseline values were compared to the input time series to identify onset and offset based on conditions in the description. |
|                 |                                                                                                          | Avg_IAV_State (AL, CA, CO, FL, GA, IL, KS, MI, NH, and TX) | States with collection between 6/1/2022 - 5/31/2023 with coverage of two or more WWTPs.            |                                                                                                                                                                                                                                                                                                      |
|                 |                                                                                                          | ILI Region (R1, R4, R5, R8, and R9)                        | Regions with available IAV wastewater data.                                                        |                                                                                                                                                                                                                                                                                                      |
| Duration        | The number of days between onset and offset                                                              | Same as Onset/Offset.                                      |                                                                                                    |                                                                                                                                                                                                                                                                                                      |
| Peak/Intensity  | The date/magnitude of the maximum input value during an influenza season                                 | Avg_IAV_State (CA, CO, GA, MN, MI, and UT)                 | States with hospitalization data and coverage of two or more WWTPs between 6/1/2022 and 5/30/2023. | The maximum of the input time series was identified to characterize peak and intensity.                                                                                                                                                                                                              |
|                 |                                                                                                          | State hospitalization rate (CA, CO, GA, MN, MI, and UT)    | States with available IAV wastewater data.                                                         |                                                                                                                                                                                                                                                                                                      |
|                 |                                                                                                          | Avg_IAV_US                                                 | NA                                                                                                 |                                                                                                                                                                                                                                                                                                      |
|                 |                                                                                                          | Overall hospitalization rate                               | NA                                                                                                 |                                                                                                                                                                                                                                                                                                      |

565

566

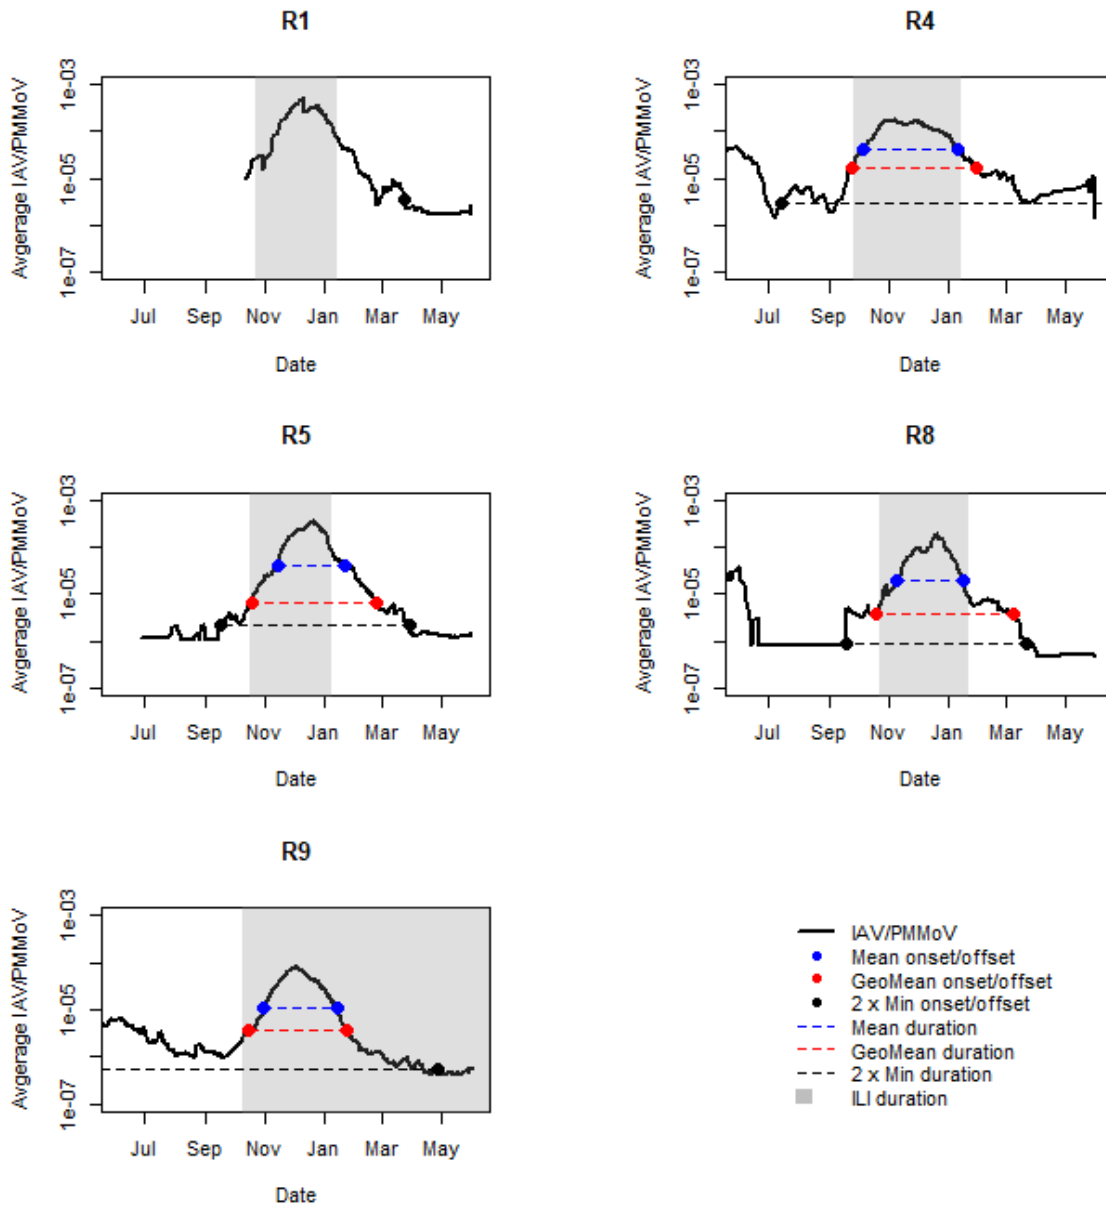

567

568

569

570

571

572

573

574

575

576

577

578

Figure 1. Comparison of alternative baseline Avg\_IAV\_Region values (y-axis) and corresponding influenza season onset, offset, and duration for HHS regions (abbreviated R) for 2022-2023 influenza season (x-axis). Baseline values were calculated using Avg\_IAV\_Region annual mean (Mean), annual geometric mean (GeoMean), and twice the minimum observation (2 x Min). Shading indicates ILI onset, offset, and duration. Lines or shading that extend beyond the plotted time period indicate that onset or offset did not occur during the period of analysis using the selected baseline. Missing duration lines and onset/offset points indicate that data was not available for calculation. A map of HHS regions is available Fig S1.

579

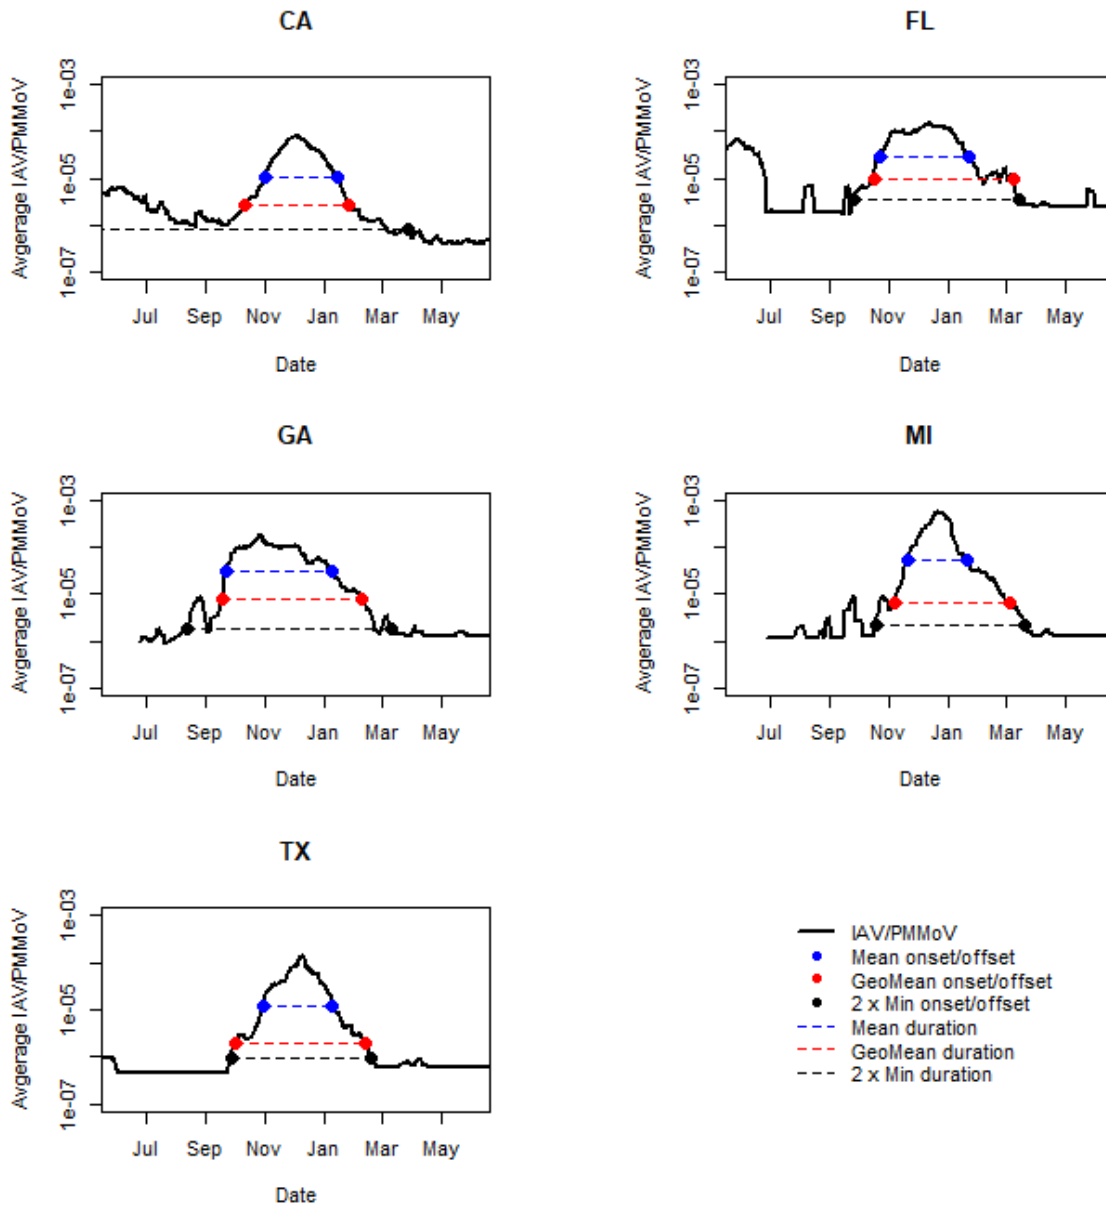

580

581

582

583

584 Figure 2. Comparison of alternative baseline Avg\_IAV\_State values (y-axis) and corresponding  
585 influenza season onset, offset, and duration for states with at least 11 months of data for 2022-  
586 2023 influenza season (x-axis). Baseline values were calculated using Avg\_IAV\_State annual  
587 mean (Mean), annual geometric mean (GeoMean), and twice the minimum observation (2 x  
588 Min). Lines that extend beyond the plotted time period indicate that onset or offset did not  
589 occur during the period of analysis using the selected baseline.

590



It is made available under a [CC-BY-NC-ND 4.0 International license](https://creativecommons.org/licenses/by-nc-nd/4.0/) .

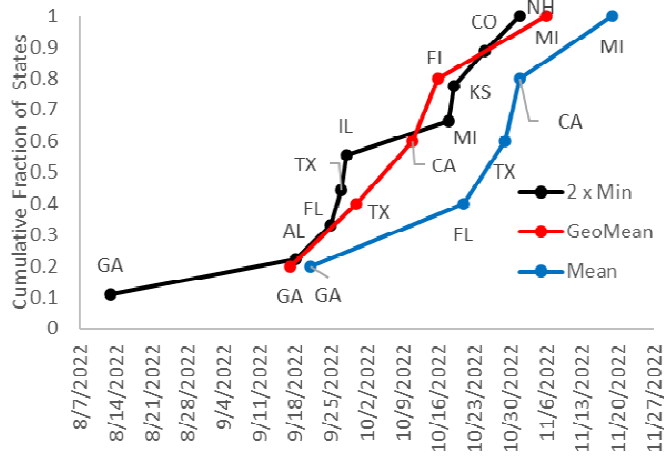

591  
592  
593  
594  
595  
596  
597  
598

Figure 3. Cumulative curves of the proportion of states with onset (y-axis) over time (x-axis) during 2022-2023 influenza season using Avg\_IAV\_State baselines of the annual mean (N=5), geometric mean (N = 5) or twice the minimum observation (2 x Min) (N = 9).

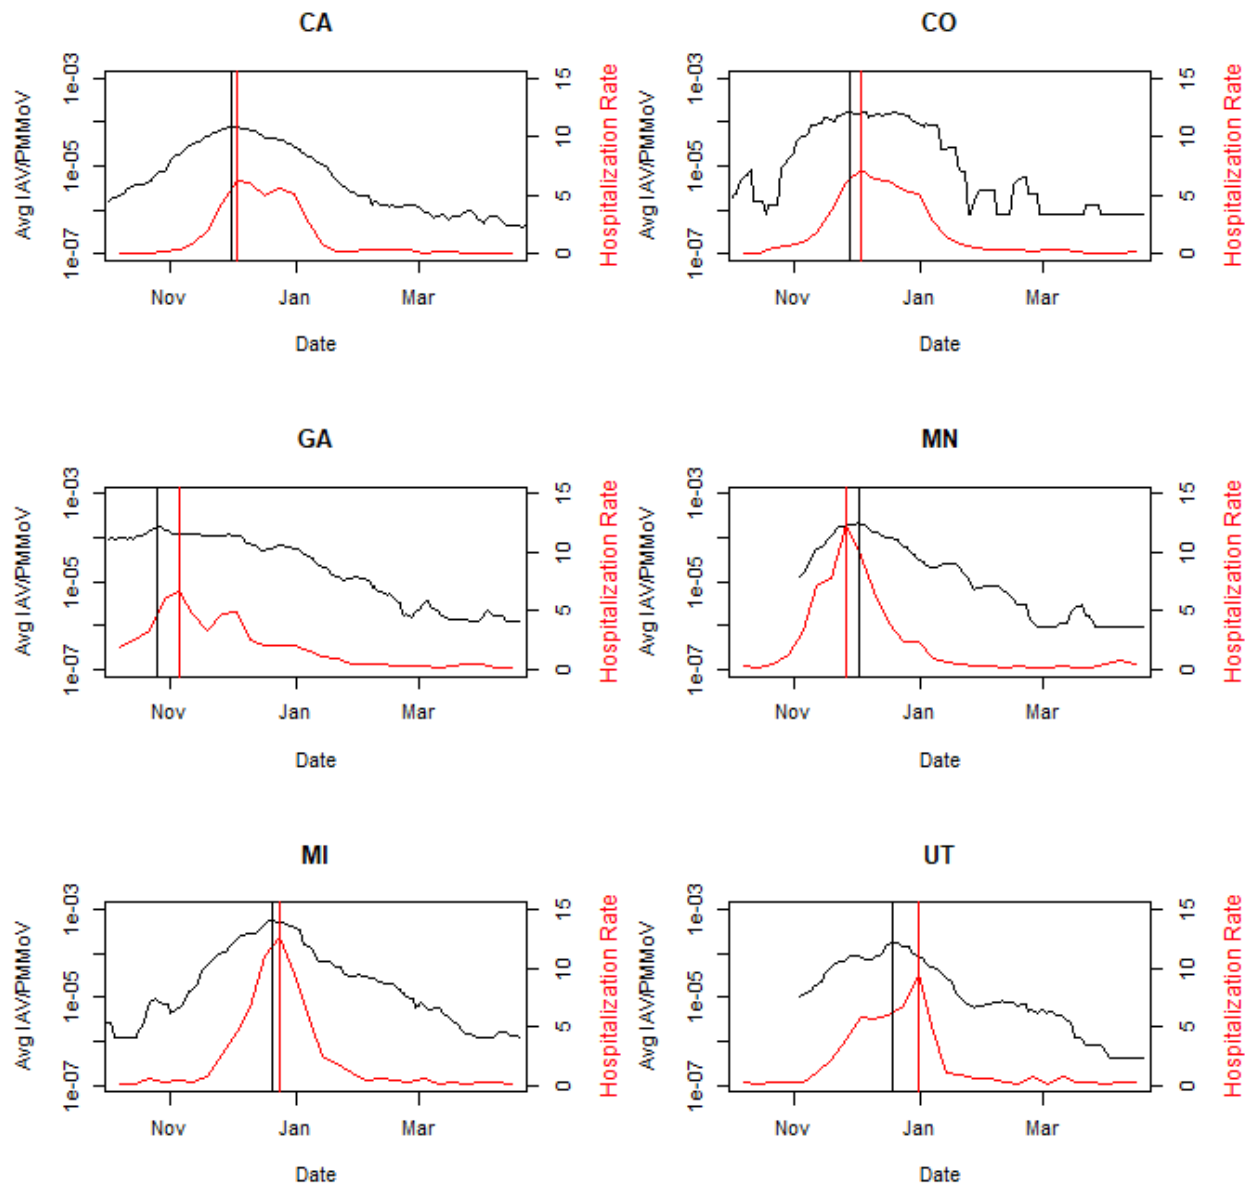

599  
600 Figure 4. 2022-2023 influenza season peak (vertical line) and intensity (y-axis) by state using  
601 Avg\_IAV\_State or FluSurv-NET hospitalization rate (hospitalizations per 100,000 population) for  
602 states with both sets of data

603

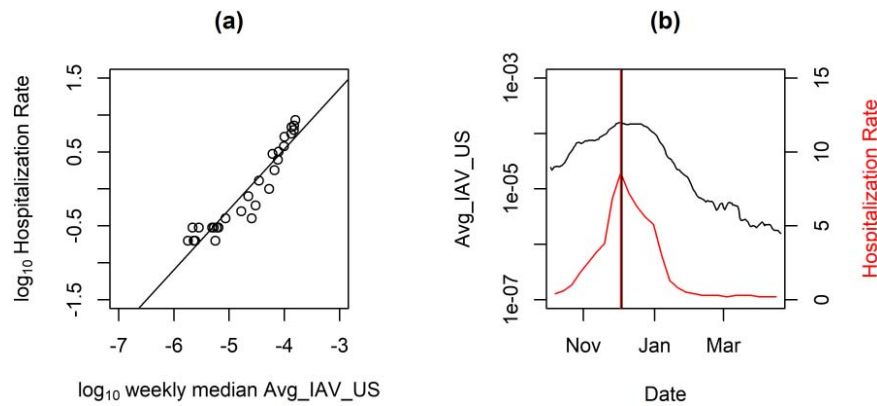

604

605

606 Figure 5. 2022-2023 Overall FluServe-Net hospitalization rate (hospitalizations per 100,000  
607 population) and Avg\_IAV\_US (a) linear relationship using log<sub>10</sub> transformed values and weekly  
608 median Avg\_IAV\_US and (b) comparison of peak and intensity with vertical lines presenting  
609 time of peak.

610

611

612

613

614

615

616

617

618

619

620

621

622

623

624

625

626

627

628

629

630

631

632

633
